# Supplementary material for: Generalizability in the Family-to-Family Education Program Randomized Waitlist-Control Trial
Source: Atypon-hosted journal article supplement (doi:10.1176/appi.ps.002912012), 2013-05-17
Supplement: 754_ds001.pdf [file 754_ds001.pdf]

## Generalizability Variables

| Instrument                                  | Label                                               |
|---------------------------------------------|-----------------------------------------------------|
| SITE                                        | Site Of Collection                                  |
| FEIS - Demographics                         | Consumer Race Is White                              |
|                                             | Married Or Living As If Married                     |
|                                             | Age (Yr)                                            |
|                                             | Male                                                |
|                                             | Total People In Household                           |
|                                             | Fm Completed 12 Yrs Education                       |
|                                             | Work Full Time                                      |
|                                             | Fm Very Involved With Consumer                      |
|                                             | Family Income >\$50000                              |
|                                             | White                                               |
|                                             | Past Month, More/About The Same Fm Involvement      |
|                                             | Currently In School Or College                      |
|                                             | Consumer Belong To The Same Race Grp                |
|                                             | Consumer Has (Another) Living Sibling ?             |
| FEIS - Family Enumeration Module            | # Of Siblings In The Same Area As Consumer          |
|                                             | # Of Living Children Consumer Has(Missing Code)     |
|                                             | Consumer Has A Living Spouse                        |
|                                             | Consumer Total # Of Siblings                        |
|                                             | # Of Living Children Under 18 Consumer Has          |
| FEIS - Contact Module                       | Seen, Talked, Knowledge Of Con Last 12 M            |
| FEIS - Assistance in Daily Living Module    | Objective Daily Living Assistance                   |
| FEIS - Supervision Module                   | Objective Supervision                               |
| FEIS - Affective Response Module            | Feis Displeasure Scale                              |
|                                             | Feis Worry Scale                                    |
| FMCS - Family Member Community Support      | Telephone Hotline Support                           |
|                                             | Grp Counseling Therapy                              |
|                                             | Counseling Or Therapy With Private Counselor        |
|                                             | Joined Nami In Past 3m Or Already Member            |
|                                             | Other Support                                       |
|                                             | Attended Any Formal Nami Educal Programs            |
|                                             | Telephone Hot Line Support                          |
|                                             | Information Present                                 |
|                                             | Some Other Form Of Mh Service/Prog                  |
|                                             | The Informal Support Is A Lot Of Help To You        |
|                                             | Religious Or Spiritual                              |
|                                             | Listserv Or Chat Room                               |
|                                             | Drop In Center                                      |
|                                             | Received Support From Mh Progs/Services In The Past |
|                                             | Support Grp(Not Nami)                               |
|                                             | Friend Or Fm Support                                |
|                                             | Received Any Informal Support Past 3m               |
| The Mh Prog Support Is A Lot Of Help To You |                                                     |
| FMQ - Family Member Questionnaire           | Fmq Worry Scale                                     |
|                                             | Fmq Know Smi Scale                                  |

## Generalizability Variables

| Instrument                               | Label                                        |
|------------------------------------------|----------------------------------------------|
| FES - Family Empowerment Scale           | Fmq Empower Scale                            |
|                                          | Fmq Burden Scale                             |
|                                          | Fmq Mh System Scale                          |
|                                          | Fes Service Scale                            |
|                                          | Fes Family Scale                             |
| CESD - Feelings CES-D Scale              | Fes Community Scale                          |
|                                          | Cesd Sum                                     |
|                                          | Knowledge Instrument                         |
| SF12                                     | Knowledge                                    |
|                                          | Sf12 Mental Scale                            |
| FAD-Family Assessment Device             | Sf12 Physical Scale                          |
|                                          | Fad General Functioning Scale                |
|                                          | Fad Problem Solving Scale                    |
| FPSC-Family Prob Solving & Communication | Fpsc Incendiary Communication                |
|                                          | Fpsc Affirming Communication                 |
|                                          | Fpsc Total                                   |
| COPE                                     | Cope Religious Scale                         |
|                                          | Cope Acceptance Scale                        |
|                                          | Cope Positive Scale                          |
|                                          | Cope Emotional Scale                         |
|                                          | Cope Denial Scale                            |
| ECI-Experience of Care Giving Inventory  | Eci Loss Scale                               |
|                                          | Eci Good Aspect Of Relationship Scale        |
|                                          | Eci Effect On Family Scale                   |
|                                          | Eci Dependency Scale                         |
|                                          | Eci Difficult Behavior Scale                 |
|                                          | Eci Stigma Scale                             |
|                                          | Eci Problem W Service Scale                  |
|                                          | Eci Positive Personal Experience Scale       |
|                                          | Eci Positive Scale                           |
|                                          | Eci Negative Symptom Scale                   |
|                                          | Eci Negative Scale                           |
|                                          | Eci Need Of Backup Scale                     |
|                                          | BSI-Brief Symptom Inventory 18               |
| Area T Score Of Gsi                      |                                              |
| Area T Score Of Dep                      |                                              |
| Area T Score Of Anx                      |                                              |
| Aggregated Consumer Background           | Consumer Has A Primary Therapist Etc         |
|                                          | Consumer Age First Received Mh Help          |
|                                          | Consumer Gender                              |
|                                          | Past 12m, Consumer Being Homeless            |
|                                          | Consumer (As If) Married                     |
|                                          | Any Mh Hospitalization In Past 6m            |
|                                          | Past 6m,# Times Consumer Hospitalized For Mh |
|                                          | Client Completed 12 Yrs Education            |
| # Times Consumer Hospitalized For Mh     |                                              |

## Generalizability Variables

| Instrument | Label                                    |
|------------|------------------------------------------|
|            | Consumer Ever Hospitalized For Mh Reason |
|            | Consumer Age                             |

**APPENDIX. Calculations for Generalizability Estimate of FTF versus Waitlist Effectiveness for Decliner Population with Standard Error**

*Notation:* Let  $n_{Dk0}$  be the number of decliner participants in the  $k^{\text{th}}$  quintile at baseline. Let  $N_{D0}$  be the total number of decliner participants at baseline. Let  $n_{Fk3}$  and  $n_{Wk3}$  be the number of FTF and Waitlist participants in the  $k^{\text{th}}$  quintile at 3 months, respectively. Let  $\bar{Y}_{Fk3}$  and  $\bar{Y}_{Wk3}$  be the mean of Y for the  $k^{\text{th}}$  quintile FTF and Waitlist participants, measured at 3 months, respectively. Let  $S_{Fk3}^2$  and  $S_{Wk3}^2$  be the sample variances for the FTF and Waitlist participants in the  $k^{\text{th}}$  quintile, measured at 3 months.

The following gives an estimate of  $\tau_D$  = the FTF versus Waitlist effect for the decliner population and its standard error:

$$\tau_D = \sum_{k=1 \text{ to } 5} (n_{Dk0}/N_{D0}) (\bar{Y}_{Fk3} - \bar{Y}_{Wk3})$$

For each quintile k, calculate mean Y for FTF  $k^{\text{th}}$  quintile – mean Y for Waitlist  $k^{\text{th}}$  quintile and multiply this quantity by baseline proportion of decliners in  $k^{\text{th}}$  quintile. Then  $\tau_D$  is the sum of these quantities over all five quintiles.

The following gives the standard error:

$$Se(\tau_D) = \left\{ \sum_{k=1 \text{ to } 5} (n_{Dk0}/N_{D0})^2 (S_{Fk3}^2/n_{Fk3} + S_{Wk3}^2/n_{Wk3}) \right\}^{1/2}$$

For each quintile k, calculate the square of the se for FTF  $k^{\text{th}}$  quintile and add to square of se for Waitlist  $k^{\text{th}}$  quintile. Multiple this quantity by square of baseline proportion of decliners in  $k^{\text{th}}$  quintile. Then  $Se(\tau_D)$  is the square root of 1/5 times the sum of these quantities over all five quintiles.
